# Supplementary material
Source: PubMed Central journal article supplement (PMC2745673)
Supplement: neo1110_1074SD1.pdf [file neo1110_1074SD1.pdf]

**Table W1.** Colorectal Tumors Used.

| Sample No. | Sex    | Race | Age at Diagnosis (years) | Nodes Examined | Nodes Positive | T | N | M | Sample Type |
|------------|--------|------|--------------------------|----------------|----------------|---|---|---|-------------|
| 18964      | Male   | AA   | 83                       | 16             | 0              | 3 | 0 | 0 | SAGE        |
| 11330      | Female | AA   | 72                       | 10             | 0              | 2 | 0 | 0 | Validation  |
| 15095      | Male   | UNK  | 67                       | 17             | 0              | 3 | 0 | 0 | Validation  |
| 16377      | Male   | CA   | 69                       | 37             | 0              | 3 | 0 | 0 | Validation  |
| 18091      | Male   | CA   | 83                       | 28             | 0              | 3 | 0 | 0 | Validation  |
| 23662      | Male   | CA   | 63                       | 5              | 0              | 2 | 0 | 0 | Validation  |
| 29112      | Female | CA   | 84                       | 15             | 0              | 3 | 0 | 0 | Validation  |
| 30232      | Male   | CA   | 74                       | 26             | 0              | 2 | 0 | 0 | Validation  |
| 30449      | Male   | CA   | 68                       | 15             | 0              | 3 | 0 | 0 | Validation  |
| 40102      | Female | CA   | 81                       | 15             | 0              | 3 | 0 | 0 | Validation  |
| 40415      | Male   | CA   | 19                       | 17             | 0              | 2 | 0 | 0 | Validation  |
| 29271      | Female | CA   | 56                       | 26             | 2              | 3 | 1 | 1 | SAGE        |
| 10028      | Male   | CA   | 53                       | 29             | 7              | 3 | 2 | 1 | Validation  |
| 10863      | Female | AA   | 55                       | 11             | 5              | 3 | 2 | 0 | Validation  |
| 11945      | Female | CA   | 51                       | 14             | 9              | X | 2 | X | Validation  |
| 12188      | Female | AA   | 46                       | 20             | 4              | 3 | 2 | 0 | Validation  |
| 14276      | Male   | AA   | 55                       | 37             | 2              | 3 | 1 | 0 | Validation  |
| 30936      | Female | CA   | 77                       | 30             | 1              | 2 | 1 | 0 | Validation  |
| 29137      | Female | CA   | 72                       | 2              | 1              | 4 | 2 | 1 | Validation  |
| 29152      | Male   | CA   | 56                       | 29             | 12             | 3 | 2 | 0 | Validation  |
| 29203      | Female | AA   | 65                       | 58             | 3              | 3 | 1 | 0 | Validation  |
| 29259      | Female | CA   | 67                       | 32             | 3              | 2 | 1 | 0 | Validation  |
| 29292      | Male   | CA   | 54                       | 15             | 1              | 3 | 1 | 0 | Validation  |
| 3357       | Male   | CA   | 57                       | 13             | 8              | 3 | 2 | 1 | Validation  |
| 40131      | Female | CA   | 63                       | 20             | 1              | 3 | 1 | 0 | Validation  |

Tumor nos. 18964 and 29271 were used for SAGE; the remaining tumors were used for validation studies.  
*AA* indicates African American; *CA*, Caucasian American; *UNK*, unknown.
